# Supplementary material for: Interfacial engineering and optical coupling for multicolored semitransparent inverted organic photovoltaics with a record efficiency of over 12%
Source: Royal Society of Chemistry journal article supplement (doi:10.1039/c9ta05789g), 2019-01-01
Supplement: c9ta05789g1.pdf [file c9ta05789g1.pdf]

## Supplementary Information

### Interfacial Engineering and Optical Coupling for Multicolored Inverted Semitransparent Organic Photovoltaics with Record Efficiency Over 12%

*Yiming Bai<sup>1</sup>, Chunyan Zhao<sup>1</sup>, Xiaohan Chen<sup>1</sup>, Shuai Zhang<sup>2</sup>, Shaoqing Zhang<sup>3</sup>, Tasawar Hayat<sup>4</sup>, Ahmed Alsaedi<sup>4</sup>, Zhan'ao Tan<sup>1,2,\*</sup>, Jianhui Hou<sup>3</sup> and Yongfang Li<sup>3</sup>*

X-ray photoelectron spectroscopy (XPS) was investigated to characterize the chemical composition and electronic states of SnO<sub>2</sub>, as shown in **Figure S1**. The SnO<sub>2</sub> films were prepared by SnO<sub>2</sub> colloid precursor annealing at 150 °C for 30 min in ambient air. The binding energy (BE) is corrected for specimen charge by referencing the C 1s peak at 284.80 eV (**Fig. S1e**). The XPS spectrum survey ranged from 0 to 1350 eV is given in **Figure S1a**, and the peaks from Sn 4d, Sn 3d<sub>5/2</sub>, Sn 3d<sub>3/2</sub>, Sn 3p<sub>3/2</sub>, Sn 2p<sub>1/2</sub>, O 1s, O Auger, Sn Auger confirms the presence of presence of O and Sn. The XPS spectrum of the core level Sn 3d in **Figure S1b** has a strong spin-orbit doublet, the peaks located at 486.46 eV and 494.87 eV correspond to Sn 3d<sub>5/2</sub> and Sn 3d<sub>3/2</sub>, respectively. It is apparent that the Sn 3d peaks revealed just one symmetrical component without any shoulder, which indicates only a Sn<sup>4+</sup> chemical state in SnO<sub>2</sub> film. <sup>1</sup> The asymmetric O 1s X-ray photoelectron spectrum can be fitted out two peaks, as shown in **Figure S1c**, the main binding energy (530.60 eV) is attributed to the O<sup>2-</sup> state in SnO<sub>2</sub> while the higher binding energy (531.80 eV) correspond to the chemisorbed oxygen atoms or hydroxyl groups, indicating the composition of SnO<sub>2</sub>, which shows reasonably good agreement with previous studies. <sup>2-4</sup> The binding energy peaks at 292.67 and 295.46 eV in **Figure S1d** can be assigned to K 3p<sub>3/2</sub>, K 2p<sub>1/2</sub>, which confirm the presence of potassium ions with the purpose of interface passivation. <sup>5</sup>

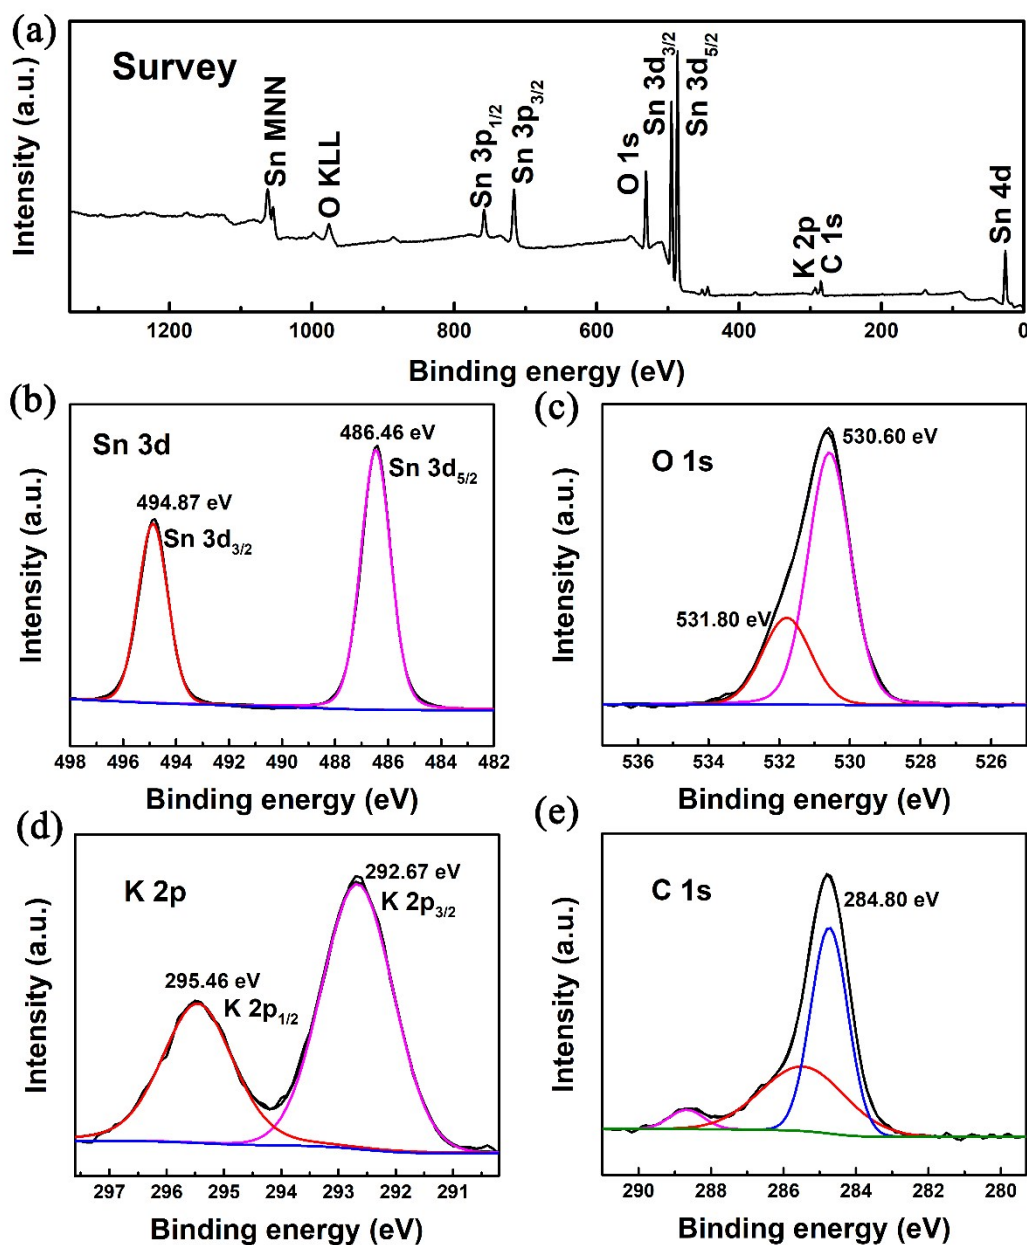

**Figure S1** XPS spectra of a) survey, b) Sn 3d, (c) O 1s, d) K 2p and e) C 1s peaks for SnO<sub>2</sub> film coated on the ITO substrate.

**Figure S2a-c** displays the UPS survey scan of SnO<sub>2</sub> layer to verify its energy level. The work function (WF) of SnO<sub>2</sub> layer is 4.89 eV obtained from the difference between the incident light energy (He I, 21.22 eV) and the energy of the cutoff (16.33 eV),<sup>6</sup> and the valence band (VB) maximum is 7.54 eV calculated from the WF and the onset (4.89+2.65=7.54 eV), predicting an outstanding hole blocking ability<sup>[7]</sup>. The band gap is 3.35 eV by the onset of the

absorption spectra in **Figure S2a**. Therefore, the conduction band (CB) is 4.12 eV ( $7.54 - 3.42 = 4.12$  eV).

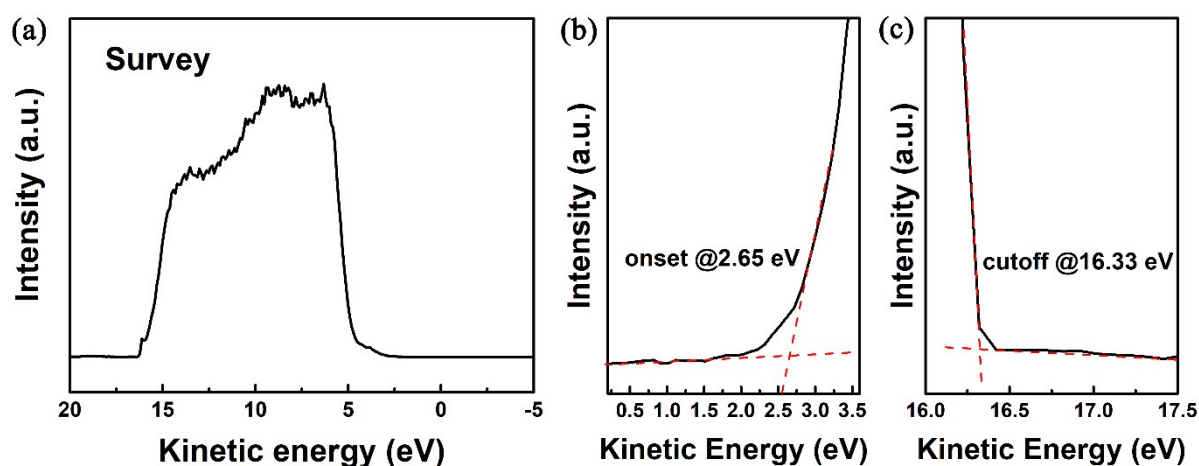

**Figure S2.** UPS spectra of SnO<sub>2</sub> film.

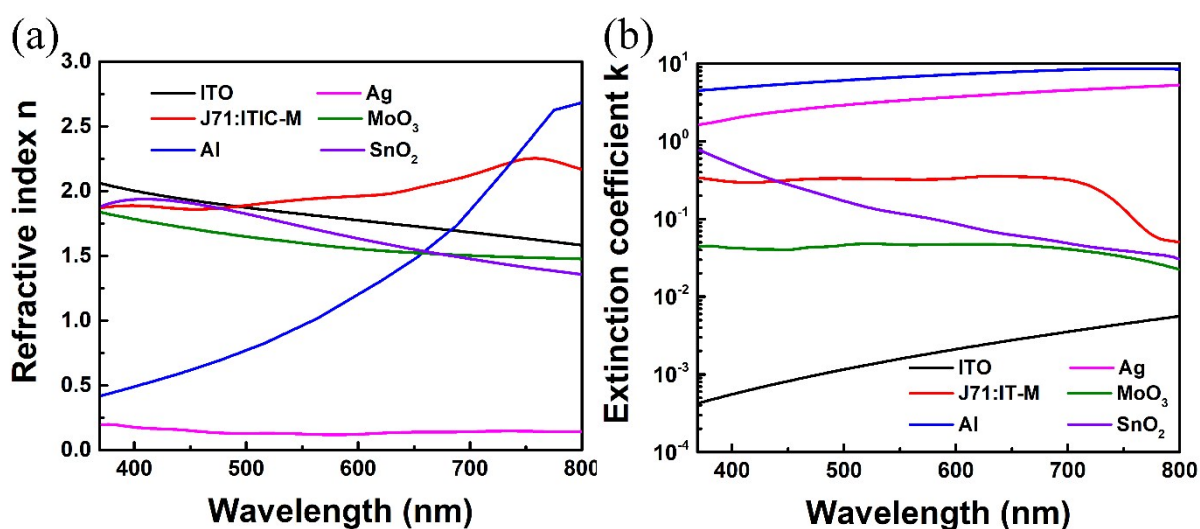

**Figure S3.** (a) Refractive index  $n$  and (b) extinction coefficient  $k$  of layers involved in the devices.

Due to the variety of colors, a set of standard colors need to be selected so that they can fully represent commonly used colors. In the CIE color system, 8 typical colors with multiple tones, medium brightness values and chroma (TSC01-08) are adopted to get CRI value via comparing the spectra of different light sources with the spectrum of the specified color sample.

[8] The specific calculation process is as follows. Firstly, the color displacement  $\Delta E_i$  in the

ultraviolet visible color system can be obtained by measuring color coordinate differences of samples under the illumination of test source and the reference light source. Then the special color rendering index  $R_i$  of samples is calculated according to the equation of  $R_i=100-4.6\Delta E_i$ . Lastly, the average CRI is obtained by taking an arithmetic mean of  $R_i$  measured by eight standard swatches. The chromaticity by test source after von Kris chromatic adaption can be seen in **Table S1 and S2**, which were measured by the transmitted light of PBDB-T-2F:ITIC-4F- and PBDB-T-2F:Y6-based ST-OSCs under AM1.5G illumination.

**Table S1.** Color rendering indices (CRIs) of the TCS01-08 illuminated by the transmitted light of the PBDB-T-2F:Y6-based ST-OSCs under AM1.5G illumination (average CRI=97.6).

|       | $u'_{k,i}$ | $v'_{k,i}$ | $Y_{k,i}$ | $W^{\square}_{k,i}$ | $U^{\square}_{k,i}$ | $V^{\square}_{k,i}$ | $\Delta E_i$ |       |      |
|-------|------------|------------|-----------|---------------------|---------------------|---------------------|--------------|-------|------|
| TSC01 | 0.2109     | 0.2861     | 28.16     | 59.06               | 24.52               | 10.66               | 0.48         | $R_1$ | 97.8 |
| TSC02 | 0.1922     | 0.3184     | 27.62     | 58.57               | 10.12               | 35.16               | 0.41         | $R_2$ | 98.1 |
| TSC03 | 0.1675     | 0.3426     | 29.59     | 60.33               | -8.96               | 55.22               | 0.17         | $R_3$ | 99.2 |
| TSC04 | 0.1407     | 0.3100     | 30.69     | 61.27               | -30.41              | 30.07               | 0.34         | $R_4$ | 98.4 |
| TSC05 | 0.1540     | 0.2643     | 32.50     | 62.78               | -20.37              | -6.49               | 0.42         | $R_5$ | 98.0 |
| TSC06 | 0.1648     | 0.2293     | 31.97     | 62.35               | -11.43              | -34.78              | 0.66         | $R_6$ | 96.9 |
| TSC07 | 0.1918     | 0.2276     | 29.81     | 60.52               | 10.14               | -35.15              | 0.56         | $R_7$ | 97.4 |
| TSC08 | 0.2075     | 0.2473     | 30.78     | 61.35               | 22.83               | -22.74              | 1.07         | $R_8$ | 95.1 |

**Table S2.** Color rendering indices (CRIs) of the TCS01-08 illuminated by the transmitted light of the PBDB-T-2F:ITIC-4F-based ST-OSCs under AM1.5G illumination (average CRI=97.5).

|       | $u'_{k,i}$ | $v'_{k,i}$ | $Y_{k,i}$ | $W_{k,i}$ | $U_{k,i}$ | $V_{k,i}$ | $\Delta E_i$ |       |      |
|-------|------------|------------|-----------|-----------|-----------|-----------|--------------|-------|------|
| TSC01 | 0.2163     | 0.2956     | 28.40     | 59.28     | 26.07     | 10.18     | 0.65         | $R_1$ | 97.0 |
| TSC02 | 0.1973     | 0.3249     | 27.85     | 58.78     | 11.40     | 32.46     | 0.58         | $R_2$ | 97.3 |
| TSC03 | 0.1721     | 0.3467     | 29.79     | 60.50     | -8.12     | 50.53     | 0.53         | $R_3$ | 97.6 |
| TSC04 | 0.1439     | 0.3168     | 30.59     | 61.19     | -30.66    | 27.33     | 0.43         | $R_4$ | 98.0 |
| TSC05 | 0.1558     | 0.2744     | 32.26     | 62.59     | -21.63    | -6.15     | 0.62         | $R_5$ | 97.2 |
| TSC06 | 0.1660     | 0.2408     | 31.58     | 62.02     | -13.22    | -33.56    | 0.88         | $R_6$ | 95.9 |
| TSC07 | 0.1947     | 0.2398     | 29.66     | 60.38     | 9.64      | -33.44    | 0.39         | $R_7$ | 98.2 |
| TSC08 | 0.2117     | 0.2556     | 30.77     | 61.34     | 23.33     | -21.41    | 0.33         | $R_8$ | 98.5 |

## References

1. L. Xiong, M. Qin, G. Yang, Y. Guo, H. Lei, Q. Liu, W. Ke, H. Tao, P. Qin and S. Li, *J. Mater. Chem. A.*, 2016, **4**, 8374-8383.
2. H. L. Yip and A. K. Y. Jen, *Energy Environ. Sci.*, 2012, **5**, 5994-6011.
3. W. Ke, G. Fang, Q. Liu, L. Xiong, P. Qin, H. Tao, J. Wang, H. Lei, B. Li and J. Wan, *J. Am. Chem. Soc.*, 2015, **137**, 6730-6733.
4. M. Kwoka, L. Ottaviano, M. Passacantando, S. Santucci, G. Czempik and J. Szuber, *Thin Solid Films*, 2005, **490**, 36-42.
5. T. Bu, J. Li, F. Zheng, W. Chen, X. Wen, Z. Ku, Y. Peng, J. Zhong, Y. Cheng and F. Huang, *Nat. Commun.*, 2018, **9**, 4609.
6. C. Li, H. Zhu, Y. Wang, H. Liu, S. Hu, F. Wang, B. Zhang and S. Dai, *Nano energy*, 2017, **31**, 201-209.
7. H. L. Yip and A. K. Y. Jen, *Energy Environ. Sci.*, 2012, **5**, 5994-6011.
8. A. Colsmann, A. Puetz, A. Bauer, J. Hanisch, E. Ahlswede and U. Lemmer, *Adv. Energy Mater.*, 2011, **1**, 599-603.
